# Supplementary material for: Ratiometric and amplified fluorescence nanosensor based on a DNA tetrahedron for miRNA imaging in living cells
Source: Royal Society of Chemistry journal article supplement (doi:10.1039/d1tb01537k), 2021-01-01
Supplement: d1tb01537k1.pdf [file d1tb01537k1.pdf]

*Supplementary Information for*

Ratiometric and amplified fluorescent nanosensor based on  
DNA tetrahedron for miRNA imaging in living cells

Liuting Mo, Danlian Liang, Wanqi He, Chan Yang, and Weiyong Lin\*

Guangxi Key Laboratory of Electrochemical Energy Materials, Institute of Optical  
Materials and Chemical Biology, College of Chemistry and Chemical Engineering,  
Guangxi University, Nanning, Guangxi 530004, P. R. China

\*Email: [weiyonglin2013@163.com](mailto:weiyonglin2013@163.com)

## Table of contents

|                               |    |
|-------------------------------|----|
| 1. Supplementary Table.....   | 1  |
| 1.1 Table S1.....             | 1  |
| 1.2 Table S2.....             | 2  |
| 2. Supplementary Figures..... | 3  |
| 2.1 Figure S1.....            | 3  |
| 2.2 Figure S2.....            | 4  |
| 2.3 Figure S3.....            | 5  |
| 2.4 Figure S4.....            | 6  |
| 2.5 Figure S5.....            | 7  |
| 2.6 Figure S6.....            | 8  |
| 2.7 Figure S7.....            | 9  |
| 2.8 Figure S8.....            | 10 |
| 2.9 Figure S9.....            | 11 |
| 2.10 Figure S10.....          | 12 |
| 2.11 Figure S11.....          | 13 |
| 2.12 Figure S12.....          | 14 |
| 2.13 Figure S13.....          | 15 |
| 3. Reference.....             | 16 |

## Supplementary Table

**Table S1. Sequence of oligonucleotides used in this work.**

| Oligonucleotides | Sequence (5'-3')                                                                                |
|------------------|-------------------------------------------------------------------------------------------------|
| S1               | AACTATACAACCTACTACCTCAGAGTCAGTTTTTACATTCCTAAGT<br>CTGAAACATTACAGCTTGCTACACGAGAAGAGCCGCCATAGTA   |
| S2               | AACTATACAACCTACTACCTCAGAGTCAGTTTTTTATCACCAGGCA<br>GTTGACAGTGTAGCAAGCTGTAATAGATGCGAGGGTCCAATAC   |
| S3               | AACTATACAACCTACTACCTCAGAGTCAGTTTTTTCAACTGCCTGG<br>TGATAAAACGACACTACGTGGGAATCTACTATGGCGGCTCTCC   |
| S4               | AACTATACAACCTACTACCTCAGAGTCAGTTTTTTTCAGACTTAGG<br>AATGTGCTTCCCACGTAGTGTCTGTTTGTATTGGACCCTCGCATC |
| F                | FAM-ATGACTCTGAGGTAGTAGGTTGACAGAGTCAT-TAMRA                                                      |
| S5               | ACATTCCTAAGTCTGAAACATTACAGCTTGCTACACGAGAAGAGC<br>CGCCATAGTAAGTAACGTCTAGTAT                      |
| S6               | TATCACCAGGCAGTTGACAGTGTAGCAAGCTGTAATAGATGCGAG<br>GGTCCAATACAGTAACGTCTAGTAT                      |
| S7               | TCAACTGCCTGGTGATAAAACGACACTACGTGGGAATCTACTATG<br>GCGGCTCTCCAGTAACGTCTAGTAT                      |
| S8               | TTCAGACTTAGGAATGTGCTTCCCACGTAGTGTCTGTTTGTATTGGA<br>CCCTCGCATCAGTAACGTCTAGTAT                    |
| H                | TGACTCTGAGGTAGTAGGTTGTTTATATTTATTTATAATACTAGAC<br>GTTACT                                        |
| let-7a           | UGAGGUAGUAGGUUGUAUAGUU                                                                          |
| let-7i           | UGAGGUAGUAGUUUGUGCUGUU                                                                          |
| let-7d           | AGAGGUAGUAGGUUGCAUAGUU                                                                          |
| miR-429          | UAAUACUGUCUGGUAACCGU                                                                            |
| miR-200b         | UAAUACUGCCUGGUAUGAUGAC                                                                          |
| let-7a mimics    | TGAGGTAGTAGGTTGTATAGTT                                                                          |
| anti-let-7a      | AACTATACAACCTACTACCTCA                                                                          |

**Table S2. Comparison of different sensors for intracellular miRNA analysis.**

| <b>Method</b>                           | <b>Linear Range</b> | <b>Sensitivity</b> | <b>Ref. No.</b> |
|-----------------------------------------|---------------------|--------------------|-----------------|
| DNA Triangle-Protected Molecular Beacon | 0.3-50 nM           | 100 pM             | 1               |
| DNAzyme-based amplification strategy    | 0.1-10 nM           | 44 pM              | 2               |
| Protein scaffolded DNA tetrads          | 0.05-100 nM         | 6 pM               | 3               |
| ATP-fueled DNA nanomachine              | 0.1-2 nM            | 100 pM             | 4               |
| qTDN-mediated hyperbranched HCR         | 0.2-1.2 nM          | 2.14 pM            | 5               |
| CHA-assisted DNA tetrahedron nanoprobe  | 0.1-10 nM           | 120 pM             | 6               |
| DTN-based naosensor                     | 0.5-25 nM           | 22 pM              | This work       |

## Supplementary Figures

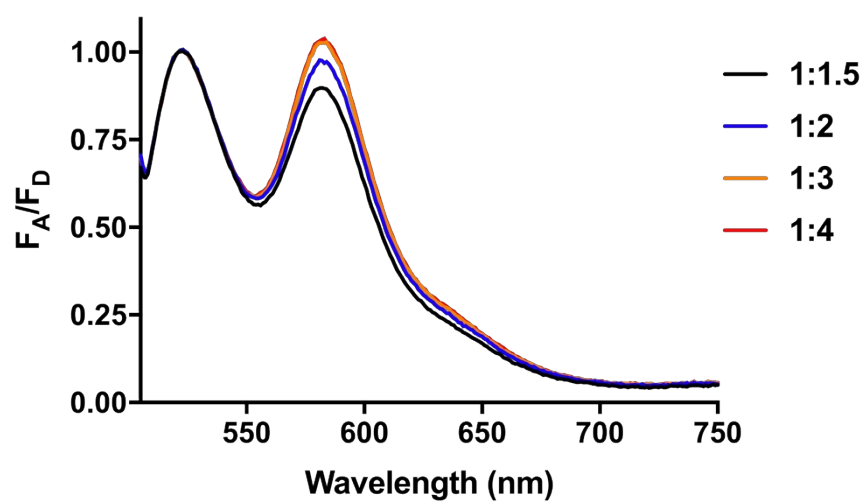

**Fig. S1** Fluorescence spectra of the DTN nanosensor with different ratios between DTN-F and DTN-H.

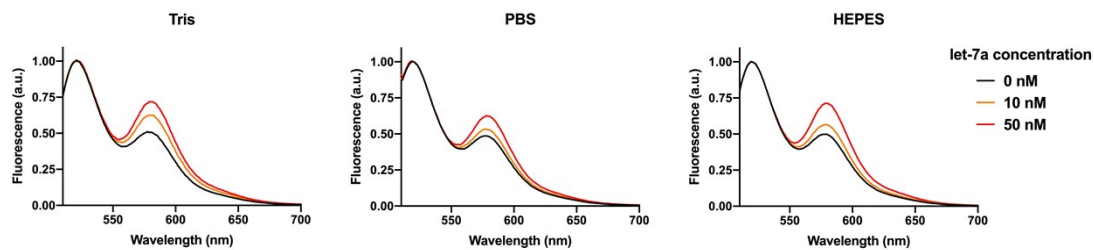

**Fig. S2** Fluorescence spectra of the DTN nanosensor in response to let-7a in Tris, PBS and HEPES buffers.

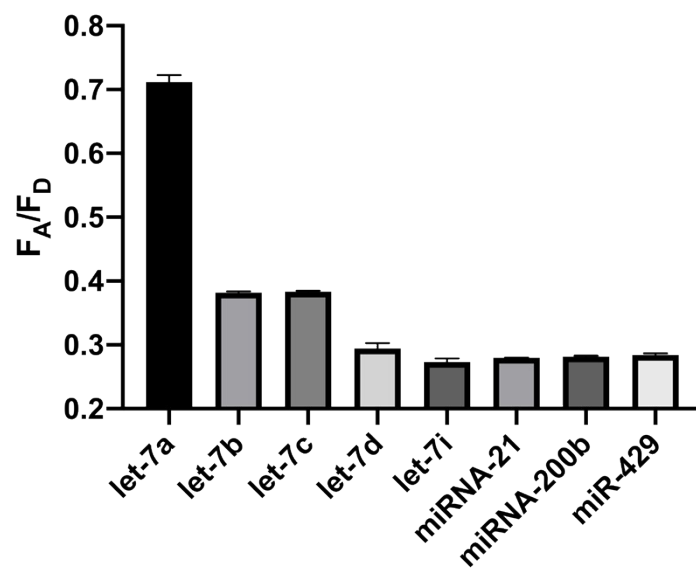

**Fig. S3** Selectivity of the DTN nanosensor to different miRNAs.

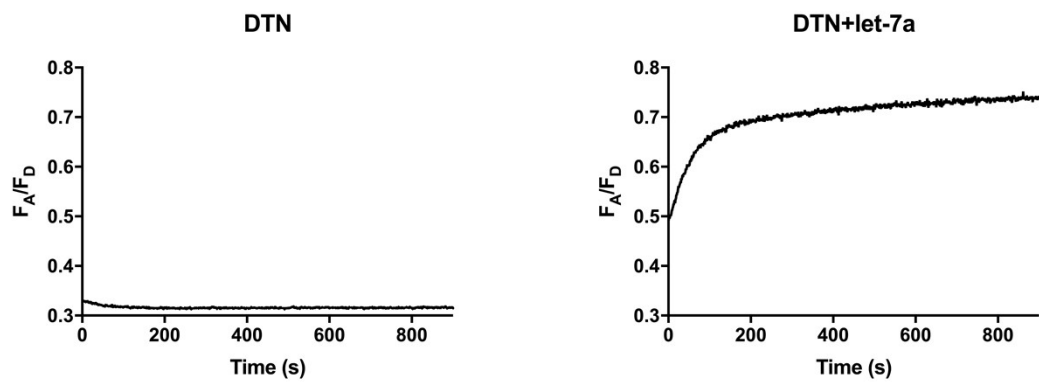

**Fig. S4** Kinetic study of the DTN nanosensor in the absence and presence of let-7a.



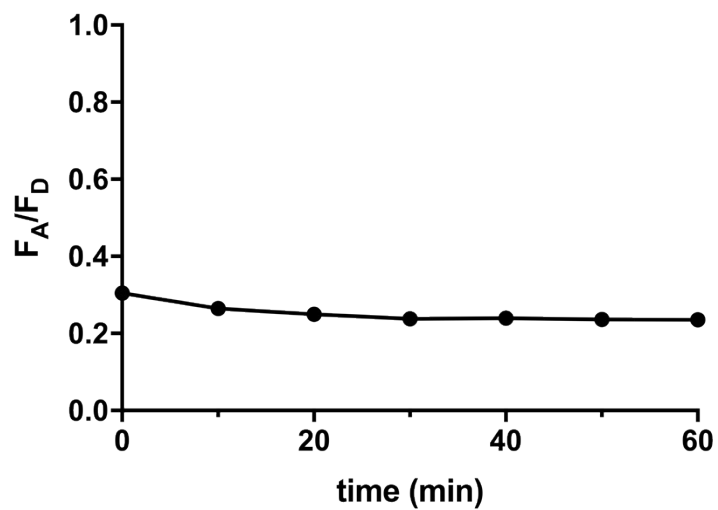

**Fig. S5** Fluorescence spectra of the DTN nanosensor with the treatment of 0.5 U/mL DNase I for 0, 10, 20, 30, 40, 50 and 60 min.

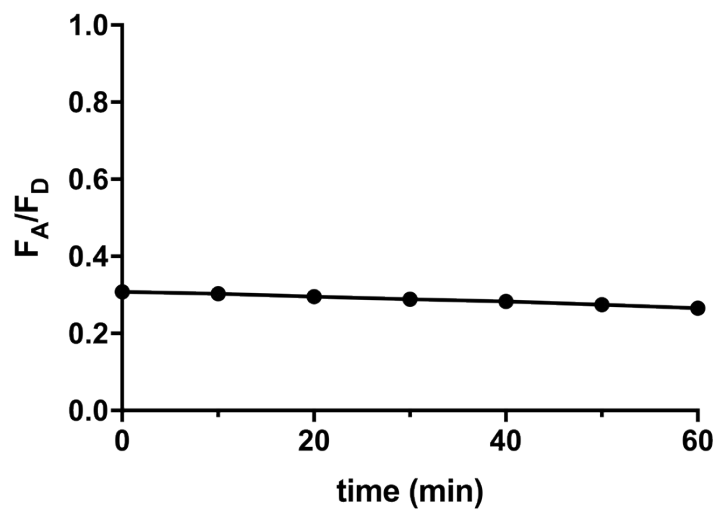

**Fig. S6** Fluorescence spectra of the DTN nanosensor with the treatment of 10% FBS for 0, 10, 20, 30, 40, 50 and 60 min.

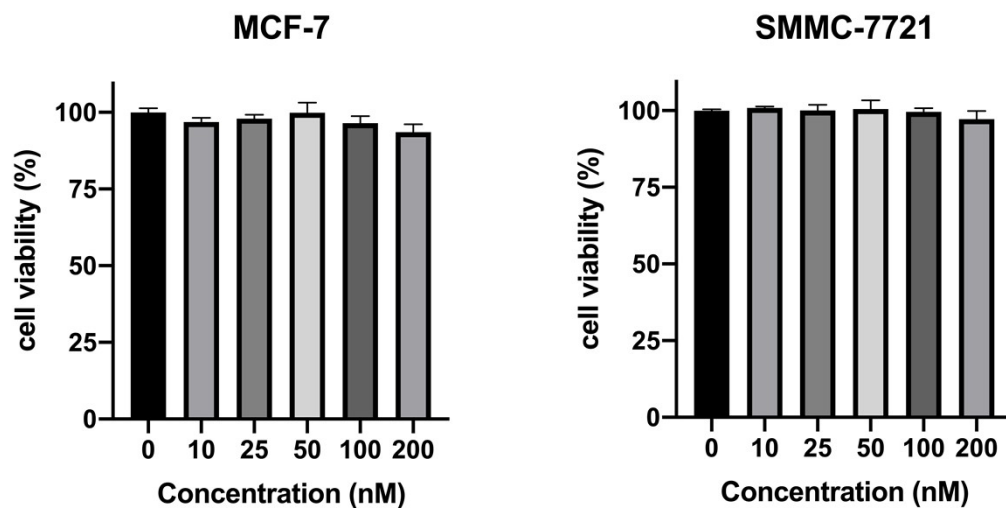

**Fig. S7** Cell viability assay of the DTN nanosensor incubated with MCF-7 and SMMC-7721 cells at various concentrations for 24 h.

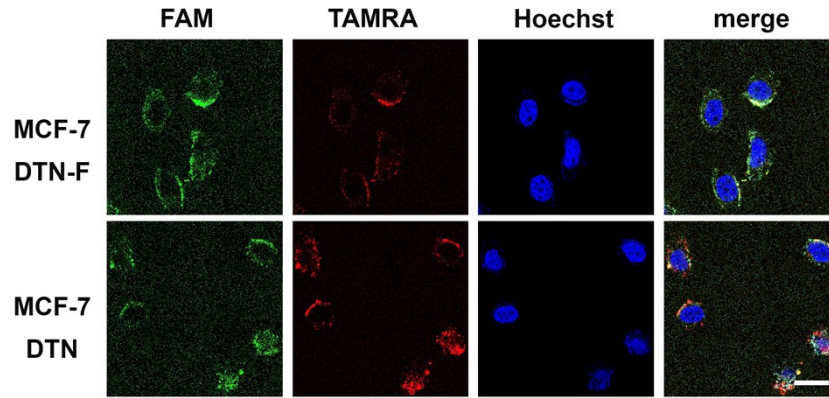

**Fig. S8** Co-localization imaging of DTN-F and the DTN nanosensor in MCF-7 cells. The green and red fluorescence indicate the location of the nanosensor, and the blue fluorescence represents the nucleus. Scale bar: 25  $\mu$ m.

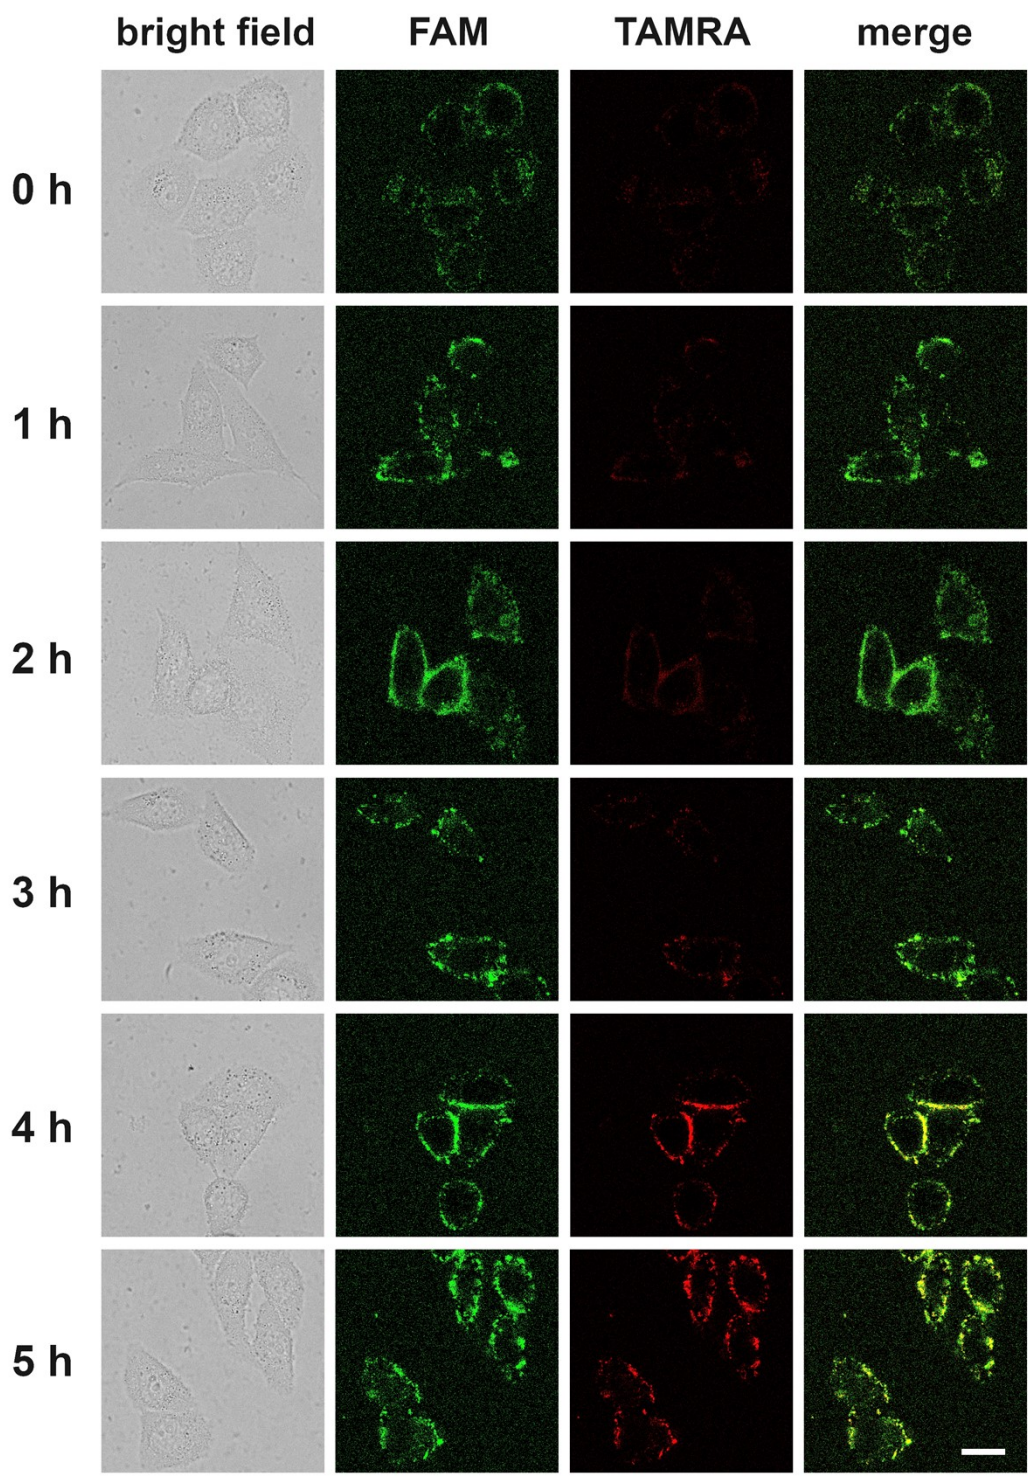

**Fig. S9** Optimization of incubation time for the DTN nanosensor in living cells. MCF-7 cells were incubated with the DTN nanosensor for 0, 1, 2, 3, 4, 5 h. Scale bar: 25  $\mu$ m.

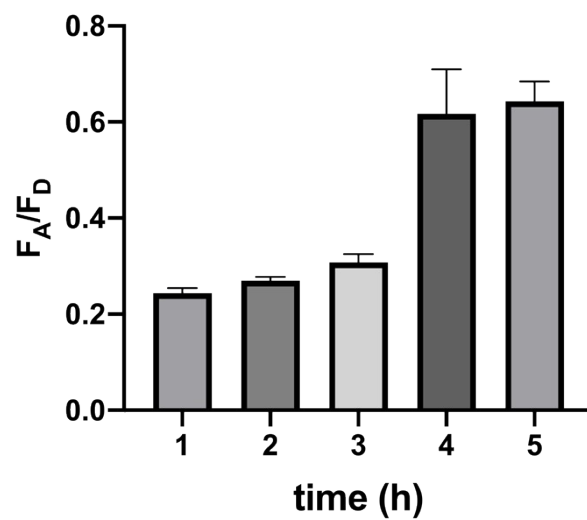

**Fig. S10** Statistical analysis of FRET signal in MCF-7 after incubation with the DTN nanosensor for 0, 1, 2, 3, 4, 5 h.

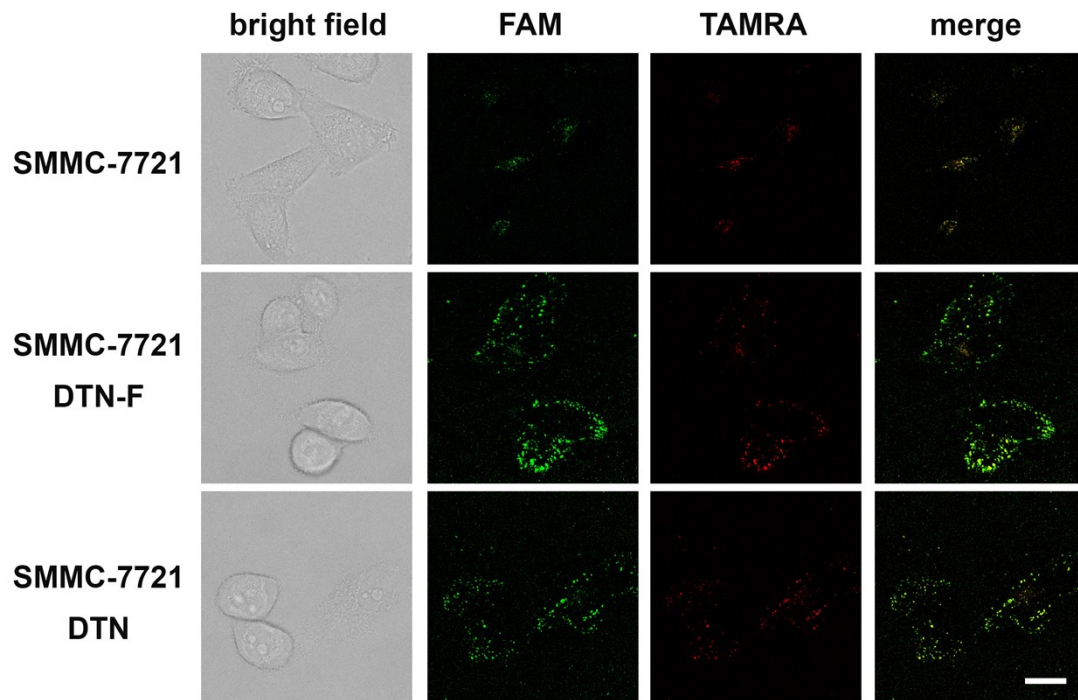

**Fig. S11** Confocal fluorescence imaging of let-7a in SMMC-7721 cells after incubation with medium, DTN-F and the DTN nanosensor, respectively. Scale bar: 25  $\mu\text{m}$ .

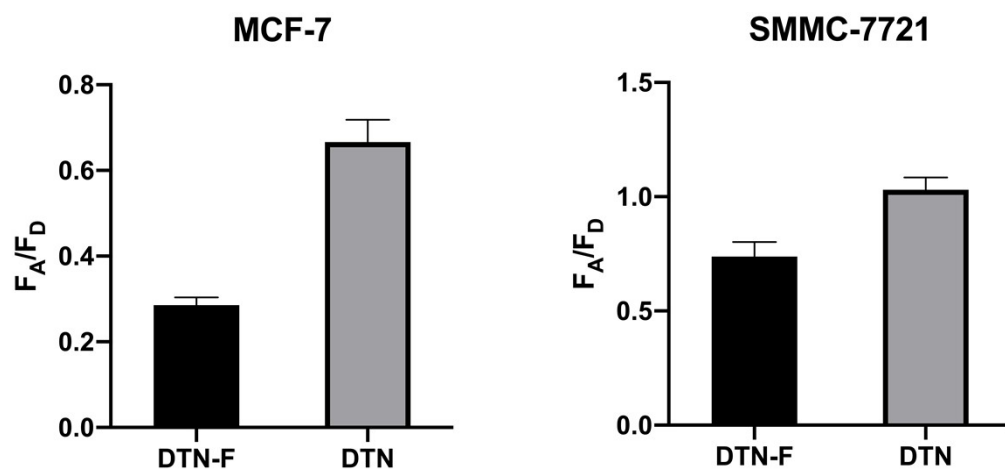

**Fig. S12** Statistical analysis of FRET signal in MCF-7 and SMMC-7721 cells before and after incubation with DTN-F or the DTN nanosensor.



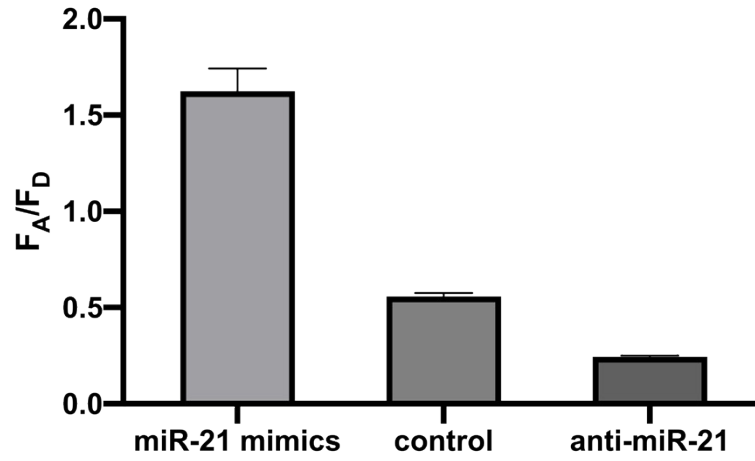

**Fig. S13** Statistical analysis of FRET signal in MCF-7 cells before and after transfected with let-7a mimics and anti-let-7a.

## Reference

1. C. Li, M. Luo, J. Wang, H. Niu, Z. Shen and Z. Wu, *ACS Sens.*, 2020, **5**, 2378-2387.
2. P. Li, M. Wei, F. Zhang, J. Su, W. Wei, Y. Zhang and S. Liu, *ACS Appl. Mater. Interfaces*, 2018, **10**, 43405-43410.
3. D. Huang, Z. Huang, H. Xiao, Z. Wu, L. Tang, J. Jiang, *Chem. Sci.*, 2018, **9**, 4892-4897.
4. P. Ma, C. Liang, H. Zhang, B. Yin, B. Ye, *Chem. Sci.*, 2018, **9**, 3299-3304.
5. J. Wang, D. Wang, J. Ma, Y. Wang, D. Kong, *Chem. Sci.*, 2019, **10**, 9758-9767.
6. Q. Huang, P. Ma, H. Li, B. Yin, B. Ye, *ACS Appl. Bio Mater.*, 2020, **3(5)**, 2861-2866.
